# Supplementary material for: A comprehensive review of deep learning-based single image super-resolution
Source: PeerJ journal article supplement (doi:10.7717/peerj-cs.621), 2021-07-13
Supplement: Supplemental_Data_S3.xlsx [file Supplemental_Data_S3.xlsx]

## Sheet: Benchmarking
Year	Method Name	PSNR (dB)	Parameters (million, M)	Computational Cost (tera, T)
2017	ESPCN	30.91	0.02	0.00143
2017	SRResNet	32.05	1.51	0.1278
2014	SRCNN	32.49	0.057	0.0527
2016	FSRCNN	32.77	0.12	0.006
2017	LapSRN	33.025	0.813	0.02995
2016	DRCN	33.32	1.77	17.974
2016	VDSR	33.33	0.666	0.6126
2017	DRRN	33.56	0.297	6.797
2017	MemNet	33.62	0.678	0.624
2017	BTSRN	33.66	0.42	0.2079
2019	FALSR-A	33.87	1.02	0.235
2018	MSRN	34.07	5.94	1.4862
2018	DBPN	34.2	5.95	3.594
2017	MDSR	34.27	6.93	1.592
2017	EDSR	34.33	40.74	9.2848
2019	Meta-RDN	34.4	22.2	5.0961
2019	SAN	34.48	15.71	4.007
2018	RCAN	34.54	15.45	3.925
2020	WRAN	34.79	2.71	3.91
