# Supplementary material for: A comprehensive review of deep learning-based single image super-resolution
Source: PeerJ journal article supplement (doi:10.7717/peerj-cs.621), 2021-07-13
Supplement: Supplemental_Table_S2.docx [file Supplemental_Table_S2.docx]

| AMDE-SR | adaptive multi-scale detail enhancement |
| --- | --- |
| BN | batch normalization |
| CARN | cascading residual network |
| CinCGAN | cycle-in-cycle GAN |
| CNF | context-wise network fusion |
| CNN | convolutional neural network |
| CVPR | conference on computer vision and pattern recognition |
| DBCN | dual-branched network |
| DBPN | deep back-propagation network |
| D-E-D | decoder-encoder-decoder |
| DenseNet | densely connected network |
| DIP | discriminable image pairs |
| dipQA | DIP inferred quality index |
| DL | deep learning |
| DNSR | denoising for SR |
| DRCN | deeply-recursive convolutional network |
| DRRN | deep recursive residual network |
| DSRN | dual-state recurrent network |
| ECCV | European conference on computer vision |
| EDSR | enhanced deep SR network |
| ESPCN | efficient sub-pixel CNN |
| ESRGAN | enhanced SRGAN |
| FH | face hallucination |
| FID | Fréchet inception distance |
| FoV | field of view |
| FR-IQA | full reference image quality assessment |
| FSIM | feature similarity index metric |
| FSRCNN | fast SRCNN |
| FSRNet | face SR network |
| FSTRN | fast spatio-temporal ResNet |
| GAN | generative adversarial nets |
| GAP | global average pooling |
| HFR | heterogeneous face recognition |
| HR | high-resolution |
| HVS | human visual system |
| IDN | information distillation network |
| IQA | image quality assessment |
| KRR | kernel ridge regression |
| LapSRN | Laplacian pyramid SR network |
| LR | low-resolution |
| MDSR | the multi-scale deep SR system |
| MemNet | memory network |
| MEON | multi-task end-to-end optimized deep neural network |
| MR | magnetic resonance |
| MSE | mean square error |
| MS-LapSRN | multi-scale LapSRN |
| MSRN | multiscale residual network |
| MS-SSIM | multi-scale SSIM |
| MWCNN | multi-level wavelet CNN |
| NTIRE | new trends in image restoration and enhancement |
| PRIM | perceptual image restoration and manipulation |
| ProSR | progressive SR |
| PSNR | peak signal-to-noise ratio |
| RBPN | recurrent back-projection network |
| RDN | residual dense network |
| ResNet | residual network |
| SAN | second-order Attention Network |
| SFT-GAN | spatial feature transformation GAN |
| SISR | single image super-resolution |
| SPCA | second-order channel attention |
| SR | super-resolution |
| SRCNN | super-resolution convolution neural network |
| SRFBN | SR feedback network |
| SSIM | structural similarity index |
| Super-FAN | FAN-based SR |
| VSRnet | video SR network |
| WRAN | wavelet-based residual attention network |
| WT | wavelet transform |
| ZSSR | zero-shot SR |
